# Supplementary material for: Global blood pressure screening during the COVID-19 pandemic: results from the May Measurement Month 2021 campaign
Source: PubMed Central journal article supplement (PMC10399936; doi:10.1097/hjh.0000000000003488), 2023-06-19
Supplement: jhype-41-1446-s001.pdf [file jhype-41-1446-s001.pdf]

## **Supplemental Material**

**Global blood pressure screening during the COVID-19 pandemic: results from the May Measurement Month 2021 campaign**

## Contents

|                        |      |
|------------------------|------|
| MMM 2021 questionnaire | p.3  |
| MMM 2021 ‘Top 10 Tips’ | p.4  |
| Data Cleaning Rules    | p.5  |
| Statistical methods    | p.7  |
| References             | p.8  |
| Supplementary results  | p.9  |
| ...Tables              | p.9  |
| ...Figures             | p.24 |

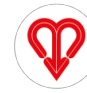

MMM21 DATA CAPTURE FORM

PLEASE COMPLETE IN BLOCK CAPITALS ONLY, IN BLACK INK AND INSERT ONLY X IN THE CHECKBOX FIELDS X

Form with sections: ABOUT THE SCREENING SITE, ABOUT THE PARTICIPANT, MEASUREMENTS. Includes questions 1-29 and a table for blood pressure measurements (30).

\*These questions must be answered in order to be submitted for May Measurement Month

NB: Do not record any personal data that would identify the patient e.g. name, address.

\*\* South Asian – with origins from: India, Pakistan, Bangladesh, Nepal, Bhutan, Maldives and Sri Lanka. East and South-East Asian – With Origins from any countries east of the Indian sub-continent.

\*\*\* This means how many types of medications are being taken i.e. – ACE-inhibitors, ARBs, diuretics, beta-blockers, calcium channel blockers, alpha-blockers, others. If you are unsure, please enter the number of different tablets each day. (If you are taking 1 tablet twice a day, this counts as 1).

† N/A = Not applicable

## OUR TOP TIPS FOR HEALTHY BLOOD PRESSURE

### THANK YOU FOR BEING PART OF MAY MEASUREMENT MONTH.

For more information visit  
[www.maymeasure.org](http://www.maymeasure.org)

If you have concerns,  
please seek advice from a  
trained medical professional.

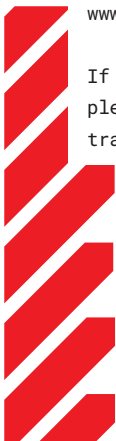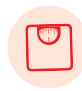

#### MAINTAIN A HEALTHY WEIGHT

Just doing this can help  
bring down high blood pressure.

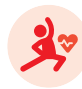

#### EXERCISE REGULARLY

Aim for an average of 30  
minutes a day. For the  
exercise to be worthwhile, you need  
to feel warmer, breathe harder,  
and your heart needs to beat faster  
than it normally does.

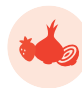

#### EAT PLENTY OF FRUIT AND/OR VEGETABLES EVERY DAY

Eat vegetables raw or  
lightly steamed, rather than boiled,  
to get maximum nutrition. Avoid  
frying where possible.

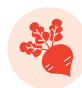

#### ADD BEETROOT TO YOUR DIET

Regular consumption of  
beetroot juice has been  
found to help reduce your blood  
pressure.

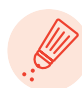

#### CUT DOWN ON SALT

Reduce your intake of salt.  
Don't forget a lot of salt  
is hidden in processed foods and is  
very high in most breads, cereals,  
soups and sauces. If possible, always  
read the label. Eating a low-fat diet  
that includes lots of fibre, such as  
bread, pasta, rice and wholegrains  
has also been found to help reduce  
blood pressure.

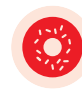

#### CUT DOWN ON FAT AND SUGAR

Always check the label on  
foods where possible and be  
especially wary of hydrogenated or  
'trans' fats, as well as sugars  
'hidden' as other names such as  
sucrose, dextrose, fructose, and  
glucose. These can be commonly found  
in items such as fruit juices and  
fizzy drinks.

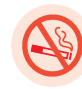

#### STOP SMOKING TOBACCO

Your arteries clog up even  
faster if you smoke and this  
causes many other health problems.  
Your blood pressure actually rises  
while you smoke.

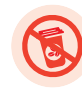

#### REDUCE YOUR CAFFEINE INTAKE

Remember caffeine is found  
in some fizzy drinks as well  
as in coffee and tea.

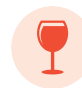

#### DON'T DRINK TOO MUCH ALCOHOL

Stick to local daily  
recommendations – usually  
less than 2 drinks for men and 1 for  
women (1 drink = small beer or wine).

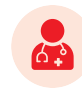

#### REGULAR CHECK UPS

Have your blood pressure  
measured by a trained  
medical professional regularly.

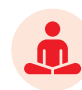

#### RELAX

Stress contributes to  
raising blood pressure.  
So, avoid stress where possible  
and allow time for relaxation.

#TheBigSqueeze

 [www.facebook.com/MayMeasure](http://www.facebook.com/MayMeasure)

 @MayMeasureOrg

 [maymeasureorg](http://maymeasureorg)

## Data cleaning rules

Rules for cleaning continuous variables and dates.  
Updated January 2022

### Weight (weight and scale variables)

Upper limit: 160.0kg (25.2 stone, 353lbs)

Lower limit: 30.0kg (4.72 stone, 66lbs)

Extract measurement scale from measurement string if missing  
Assume recorded in kg if unit of measurement missing

Convert all values to kg, then correct values:

Replace weight/1,000 if weight > 30,000

Replace weight/100 if weight > 3,000

Replace weight/10 if weight > 300

Exclude values > 160 or < 30

### Birth weight

Upper limit: 5.5kg (based on Blencowe *et al* (2019))<sup>1</sup>

Lower limit: 1.0kg

Extract measurement scale from measurement string if missing  
Assume birth weight recorded in kg if unit of measurement missing  
Replace birth weight/1,000 if birth weight > 1,000

### Survey date

Assume format DD/MM/YYYY as specified on template

If month  $\geq 13$  then switch D & M

Exclude dates where day > 31, or >30 in months of April, June, September or November, or >28 in February

### Age

Upper limit: 99 years (set ages > 99 to missing)

Lower limit: 18 years (drop participants < 18)

Set entries with age > 99 to missing  
Exclude participants from study if age recorded as < 18

### Systolic blood pressure

Upper limit: 260 mmHg

Lower limit: 80 mmHg

Multiply by 10 entries  $\geq 8$  and  $\leq 26$   
Remove first digit in entries of format 11XX (assume 1 double-typed)  
Divide by 10 entries  $\geq 1,200$  &  $\leq 2,600$   
Exclude entries outside of above range

### Diastolic blood pressure

Upper limit: 160 mmHg

Lower limit: 40 mmHg

Multiply by 10 entries  $\geq 5$  and  $\leq 15$   
Remove first digit in entries of format 11XX (assume 1 double-typed)  
Divide by 10 entries  $\geq 500$  &  $\leq 1,500$   
Exclude entries outside of above range

Drop SBP and DBP if DBP  $\geq$  SBP

### Heart rate

Upper limit: 120 bpm

Lower limit: 30 bpm

Multiply by 10 entries  $\geq 3$  and  $\leq 12$

Remove first digit in entries of format 11XX  
Divide by 10 entries  $\geq 300$  &  $\leq 1,200$   
Exclude entries outside of above range

**Sex and pregnancy/hypertension in pregnancy/hormone replacement therapy/hormonal contraception**

Set pregnancy to missing where gender = 'male' or 'other'

If gender missing and pregnancy/hypertension in previous pregnancy/hormone replacement therapy/hormonal contraception = 'yes', assume gender = 'female'

**Known hypertension and medication**

Assume known hypertension = 'yes' if medication = 'yes'

**Antihypertensive medication status and number of medication classes**

If medication status = 'none' then set medication classes to '0'

If medication = 'yes' and medication classes = '0', replace medication classes as missing

If medication classes = 0 and medication status missing, replace medication status to 'none'; if medication classes  $\geq 1$  and medication status missing, set medication status to 'yes'

## Statistical analysis

### Multiple imputation

Of 642,057 participants in MMM21, 85.5% had all three blood pressure (BP) readings, 8.8% had two readings and 5.7% had a single reading (Table S1).

**Table S1: Number of BP readings per participant**

| Number of BP readings per participant | Total   | Percentage |
|---------------------------------------|---------|------------|
| 1                                     | 36,715  | 5.7%       |
| 2                                     | 56,359  | 8.8%       |
| 3                                     | 548,983 | 85.5%      |

Given the tendency for BP readings to fall on average across subsequent clinic BP readings (Table S4), we imputed missing readings to allow for more robust comparison for those with one or more readings missing. Multiple imputation using chained equations was used, under the assumption that the pattern of missing BP readings was missing at random dependent on the observed data.

Two separate imputation models were run. The first, ‘full’ model was conducted for those with no missing data in age, sex (excluding the ‘other’ category due to small numbers), ethnicity and antihypertensive medication use (yes/no). Included in the model were: age, sex, an interaction between age and sex, ethnicity, antihypertensive medication use, known hypertension, diabetes, myocardial infarction, stroke, alcohol intake, smoking status, weight, screening site type along with each of the three systolic BP, diastolic BP and heart rate (HR) measurements, and the mean of the second and third BP and HR readings. Age was included as a restricted cubic spline with five knots to allow flexibility to modelling its relationship and weight was included along with a quadratic term.

A second imputation was run for those participants that could not be imputed using the full model (due to missing one or more of age, sex, ethnicity or antihypertensive medication use). The second, ‘partial’ model included each systolic BP and diastolic BP reading, along with the mean of the second and third BP readings.

For each imputation model, fifteen imputations were created, corresponding to the approximate percentage of missing data in the mean of the second and third BP readings. The Monte Carlo errors of estimates were <10% of their standard errors indicating sufficient precision.<sup>2</sup> A burn-in of ten iterations was deemed sufficient based on convergence of trace plots. Results from each imputation set were combined using Rubin’s combination rules.

For the primary analysis, a combined model was created, which used imputations from the full model where available, but for those individuals with missing BP readings that could not be imputed from the full model, used the partial imputation model. Sensitivity analyses were conducted comparing the complete cases analysis to each of the imputation models:

1. The complete case sample only (those with a mean of BP readings 2 and 3).
2. The partial multiple imputation model including BP readings for all participants.
3. The full multiple imputation model as described above for individuals with complete data on age, gender, ethnicity and anti-hypertensive medication use.
4. The combined model, including imputations for individuals from the partial model, where readings could not be imputed from the full model.

Results were similar across the imputation models, and the combined model was used as the primary analysis (Table S5).

## Measures of association

Measures of association between systolic or diastolic BP with different risk factors were examined using linear mixed models, for those with complete data on age, sex, ethnicity and antihypertensive medication use (i.e., for those included in the full imputation model), including the country in which the participant was screened was included as a random intercept, to account for country-level clustering. Models were adjusted for age, sex and antihypertensive medication use, including also an interaction between age and sex. Age was modelled as a restricted cubic spline with five knots, as in the full imputation model.

Models including known hypertension status and antihypertensive medication use as the exposure used only the subset of individuals with hypertension. Models using known hypertension or antihypertensive medication use as exposures were adjusted for age and sex alone. Models using pregnancy, hypertension in a previous pregnancy, hormonal contraception use and hormone replacement therapy use were adjusted for age and antihypertensive medication use alone.

Analyses was conducted using Stata version 16.1. The *mi impute chained* command was used for multiple imputation, and the *mixed* command for linear mixed models.

## References:

1. Blencowe, H. et al. National, regional, and worldwide estimates of low birthweight in 2015, with trends from 2000: a systematic analysis. *Lancet Glob. Heal.* 7, e849–e860 (2019).
2. White IR, Royston P, Wood AM, Multiple imputation using chained equations: Issues and guidance for practice. *Statistics in Medicine.* 2010: 30:4.



**Table S2: Participant mean age, sex distribution and percentage on antihypertensive medication by region and country**

| Region and country                     | Total participants | Percentage   | Mean age (SD) in years | Females*          | Males*            | On anti-hypertensive medication |
|----------------------------------------|--------------------|--------------|------------------------|-------------------|-------------------|---------------------------------|
| <b>East Asia</b>                       | <b>222,614</b>     | <b>34.7%</b> | 47.1<br>(15.6)         | 114832<br>(51.6%) | 107722<br>(48.4%) | 18097 (8.1%)                    |
| China                                  | 218,844            | 34.1%        |                        |                   |                   |                                 |
| Taiwan                                 | 3,738              | 0.6%         |                        |                   |                   |                                 |
| Mongolia                               | 32                 | <0.1%        |                        |                   |                   |                                 |
| <b>Americas</b>                        | <b>156,513</b>     | <b>24.4%</b> | 50.4<br>(16.8)         | 93310<br>(59.9%)  | 62528<br>(40.1%)  | 35953<br>(23.0%)                |
| Mexico                                 | 77,548             | 12.1%        |                        |                   |                   |                                 |
| Venezuela                              | 46,732             | 7.3%         |                        |                   |                   |                                 |
| Argentina                              | 26,070             | 4.1%         |                        |                   |                   |                                 |
| Paraguay                               | 3,633              | 0.6%         |                        |                   |                   |                                 |
| Ecuador                                | 1,326              | 0.2%         |                        |                   |                   |                                 |
| Jamaica                                | 526                | 0.1%         |                        |                   |                   |                                 |
| Brazil                                 | 340                | 0.1%         |                        |                   |                   |                                 |
| Guatemala                              | 338                | 0.1%         |                        |                   |                   |                                 |
| <b>South-east Asia and Australasia</b> | <b>89,631</b>      | <b>14.0%</b> | 43.2<br>(16.4)         | 89631<br>(14.0%)  | 44288<br>(49.9%)  | 16613<br>(18.5%)                |
| Philippines                            | 61,129             | 9.5%         |                        |                   |                   |                                 |
| Indonesia                              | 13,452             | 2.1%         |                        |                   |                   |                                 |
| Thailand                               | 10,940             | 1.7%         |                        |                   |                   |                                 |
| Vietnam                                | 2,572              | 0.4%         |                        |                   |                   |                                 |
| Australia                              | 1,348              | 0.2%         |                        |                   |                   |                                 |
| Malaysia                               | 190                | <0.1%        |                        |                   |                   |                                 |
| <b>Sub-Saharan Africa</b>              | <b>73,880</b>      | <b>11.5%</b> | 40.5<br>(16.3)         | 35422<br>(48.0%)  | 38300<br>(51.9%)  | 17777<br>(24.1%)                |
| Democratic Republic of the Congo       | 20,913             | 3.3%         |                        |                   |                   |                                 |
| Niger                                  | 11,960             | 1.9%         |                        |                   |                   |                                 |
| Kenya                                  | 9,738              | 1.5%         |                        |                   |                   |                                 |
| Nigeria                                | 9,361              | 1.5%         |                        |                   |                   |                                 |
| Malawi                                 | 7,074              | 1.1%         |                        |                   |                   |                                 |
| Ghana                                  | 4,837              | 0.8%         |                        |                   |                   |                                 |
| South Africa                           | 2,294              | 0.4%         |                        |                   |                   |                                 |
| Republic of the Congo                  | 2,135              | 0.3%         |                        |                   |                   |                                 |
| Zimbabwe                               | 2,094              | 0.3%         |                        |                   |                   |                                 |
| Uganda                                 | 1,671              | 0.3%         |                        |                   |                   |                                 |
| Cabo Verde                             | 1,214              | 0.2%         |                        |                   |                   |                                 |
| Zambia                                 | 418                | 0.1%         |                        |                   |                   |                                 |

|                                            |                |             |                        |                           |                           |                           |
|--------------------------------------------|----------------|-------------|------------------------|---------------------------|---------------------------|---------------------------|
| Mali                                       | 171            | <0.1%       |                        |                           |                           |                           |
| <b>South Asia</b>                          | <b>59,946</b>  | <b>9.3%</b> | 42.6<br>(14.8)         | 22637<br>(37.9%)          | 37152<br>(62.1%)          | 11879<br>(19.8%)          |
| Bangladesh                                 | 28,355         | 4.4%        |                        |                           |                           |                           |
| India                                      | 15,063         | 2.3%        |                        |                           |                           |                           |
| Pakistan                                   | 11,367         | 1.8%        |                        |                           |                           |                           |
| Nepal                                      | 5,161          | 0.8%        |                        |                           |                           |                           |
| <b>Europe</b>                              | <b>38,327</b>  | <b>6.0%</b> | 50.8<br>(17.4)         | 22719<br>(59.3%)          | 15550<br>(40.6%)          | 12886<br>(33.6%)          |
| Albania                                    | 11,788         | 1.8%        |                        |                           |                           |                           |
| Armenia                                    | 5,777          | 0.9%        |                        |                           |                           |                           |
| Georgia                                    | 4,935          | 0.8%        |                        |                           |                           |                           |
| Bulgaria                                   | 3,908          | 0.6%        |                        |                           |                           |                           |
| Russia                                     | 2,644          | 0.4%        |                        |                           |                           |                           |
| Spain                                      | 2,012          | 0.3%        |                        |                           |                           |                           |
| Kazakhstan                                 | 1,763          | 0.3%        |                        |                           |                           |                           |
| Poland                                     | 1,704          | 0.3%        |                        |                           |                           |                           |
| Hungary                                    | 1,414          | 0.2%        |                        |                           |                           |                           |
| United Kingdom                             | 764            | 0.1%        |                        |                           |                           |                           |
| Republic of Ireland                        | 568            | 0.1%        |                        |                           |                           |                           |
| Kyrgyzstan                                 | 359            | 0.1%        |                        |                           |                           |                           |
| North Macedonia                            | 245            | <0.1%       |                        |                           |                           |                           |
| Slovakia                                   | 197            | <0.1%       |                        |                           |                           |                           |
| Switzerland                                | 120            | <0.1%       |                        |                           |                           |                           |
| Lithuania                                  | 98             | <0.1%       |                        |                           |                           |                           |
| Denmark                                    | 31             | <0.1%       |                        |                           |                           |                           |
| <b>Northern Africa<br/>and Middle East</b> | <b>1,146</b>   | <b>0.2%</b> | 47.1<br>(16.7)         | 706<br>(61.6%)            | 440<br>(38.4%)            | 375 (32.7%)               |
| Sudan                                      | 487            | 0.1%        |                        |                           |                           |                           |
| Iran                                       | 400            | 0.1%        |                        |                           |                           |                           |
| Algeria                                    | 259            | <0.1%       |                        |                           |                           |                           |
| <b>Worldwide</b>                           | <b>642,057</b> |             | <b>46.4<br/>(16.5)</b> | <b>333965<br/>(52.2%)</b> | <b>305980<br/>(47.8%)</b> | <b>113580<br/>(17.7%)</b> |

**Table S3: Participant characteristics screened in MMM21**

| Participant characteristic                            |                                 | Total participants | Percentage including unknown | Percentage not including unknown |
|-------------------------------------------------------|---------------------------------|--------------------|------------------------------|----------------------------------|
| <b>Sex</b>                                            | Female                          | 333,965            | 52.0%                        | 52.2%                            |
|                                                       | Male                            | 305,980            | 47.7%                        | 47.8%                            |
|                                                       | Other                           | 290                | <0.1%                        | <0.1%                            |
|                                                       | Unknown                         | 1,822              | 0.3%                         |                                  |
| <b>Age (years)</b>                                    | Mean (SD)                       | 46.4 (16.5)        |                              |                                  |
|                                                       | 18-29                           | 121,671            | 19.0%                        | 19.1%                            |
|                                                       | 30-39                           | 115,660            | 18.0%                        | 18.1%                            |
|                                                       | 40-49                           | 121,071            | 18.9%                        | 19.0%                            |
|                                                       | 50-59                           | 129,556            | 20.2%                        | 20.3%                            |
|                                                       | 60-69                           | 91,534             | 14.3%                        | 14.3%                            |
|                                                       | 70 or more                      | 58,648             | 9.1%                         | 9.2%                             |
|                                                       | Unknown                         | 3,917              | 0.6%                         |                                  |
| <b>Ethnicity</b>                                      | East/south-east Asian           | 266,325            | 41.5%                        | 52.6%                            |
|                                                       | Black                           | 75,572             | 11.8%                        | 14.9%                            |
|                                                       | South Asian                     | 68,945             | 10.7%                        | 13.6%                            |
|                                                       | White                           | 51,094             | 8.0%                         | 10.1%                            |
|                                                       | Other                           | 40,726             | 6.3%                         | 8.0%                             |
|                                                       | Mixed                           | 3,347              | 0.5%                         | 0.7%                             |
|                                                       | Middle Eastern                  | 308                | 0.0%                         | 0.1%                             |
|                                                       | Unknown                         | 136,186            | 21.2%                        |                                  |
| <b>Country income group</b>                           | Low income                      | 42,276             | 6.6%                         | 6.6%                             |
|                                                       | Lower middle income             | 167,946            | 26.2%                        | 26.2%                            |
|                                                       | Upper middle income             | 419,841            | 65.4%                        | 65.4%                            |
|                                                       | High income                     | 11,994             | 1.9%                         | 1.9%                             |
| <b>On anti-hypertensive medication</b>                | No                              | 283,061            | 44.1%                        | 71.4%                            |
|                                                       | Yes                             | 113,580            | 17.7%                        | 28.6%                            |
|                                                       | Unknown                         | 245,416            | 38.2%                        |                                  |
| <b>Number of anti-hypertensive medication classes</b> | 0                               | 283,061            | 44.1%                        | 73.4%                            |
|                                                       | 1                               | 59,652             | 9.3%                         | 15.5%                            |
|                                                       | 2                               | 28,218             | 4.4%                         | 7.3%                             |
|                                                       | 3                               | 10,569             | 1.6%                         | 2.7%                             |
|                                                       | 4                               | 3,425              | 0.5%                         | 0.9%                             |
|                                                       | 5 or more                       | 809                | 0.1%                         | 0.2%                             |
|                                                       | Unknown                         | 256,323            | 39.9%                        |                                  |
| <b>Regularity of anti-hypertensive medication use</b> | I do                            | 64,720             | 10.1%                        | 53.5%                            |
|                                                       | Too expensive                   | 5,892              | 0.9%                         | 4.9%                             |
|                                                       | Not easily available            | 3,729              | 0.6%                         | 3.1%                             |
|                                                       | Side effects                    | 448                | 0.1%                         | 0.4%                             |
|                                                       | Only take them when I need them | 43,097             | 6.7%                         | 35.6%                            |
|                                                       | Prefer alternative medicine     | 919                | 0.1%                         | 0.8%                             |
|                                                       | I forget                        | 2,151              | 0.3%                         | 1.8%                             |
|                                                       | Unknown                         | 521,101            | 81.2%                        |                                  |
| <b>Location of screening site</b>                     | Hospital/clinic/pharmacy        | 331,054            | 51.6%                        | 65.7%                            |
|                                                       | Public area (outdoors)          | 77,439             | 12.1%                        | 15.4%                            |
|                                                       | Public area (indoors)           | 25,434             | 4.0%                         | 5.0%                             |
|                                                       | Workplace                       | 30,506             | 4.8%                         | 6.1%                             |
|                                                       | Other                           | 24,975             | 3.9%                         | 5.0%                             |

|                                                     |                     |             |       |       |
|-----------------------------------------------------|---------------------|-------------|-------|-------|
|                                                     | Vaccination site    | 14,779      | 2.3%  | 2.9%  |
|                                                     | Unknown             | 137,870     | 21.5% |       |
| <b>Participated in MMM<br/>2017/2018/2019</b>       | No                  | 208,226     | 32.4% | 46.7% |
|                                                     | Yes                 | 237,519     | 37.0% | 53.3% |
|                                                     | Unknown             | 196,312     | 30.6% |       |
| <b>Last BP measurement</b>                          | Never               | 53,180      | 8.3%  | 15.5% |
|                                                     | More than 12 months | 79,416      | 12.4% | 23.1% |
|                                                     | Within 12 months    | 211,405     | 32.9% | 61.5% |
|                                                     | Unknown             | 298,056     | 46.4% |       |
| <b>Diabetes</b>                                     | No                  | 444,377     | 69.2% | 94.8% |
|                                                     | Yes                 | 24,382      | 3.8%  | 5.2%  |
|                                                     | Unknown             | 173,298     | 27.0% |       |
| <b>Previous MI</b>                                  | No                  | 468,651     | 73.0% | 97.8% |
|                                                     | Yes                 | 10,535      | 1.6%  | 2.2%  |
|                                                     | Unknown             | 162,871     | 25.4% |       |
| <b>Previous stroke</b>                              | No                  | 471,594     | 73.5% | 98.7% |
|                                                     | Yes                 | 6,230       | 1.0%  | 1.3%  |
|                                                     | Unknown             | 164,233     | 25.6% |       |
| <b>On aspirin</b>                                   | No                  | 429,459     | 66.9% | 93.4% |
|                                                     | Yes                 | 30,313      | 4.7%  | 6.6%  |
|                                                     | Unknown             | 182,285     | 28.4% |       |
| <b>On a statin</b>                                  | No                  | 427,642     | 66.6% | 92.9% |
|                                                     | Yes                 | 32,460      | 5.1%  | 7.1%  |
|                                                     | Unknown             | 181,955     | 28.3% |       |
| <b>Pregnant*</b>                                    | No                  | 328,949     | 98.5% | 98.5% |
|                                                     | Yes                 | 5,016       | 1.5%  | 1.5%  |
| <b>Hypertensive in previous<br/>pregnancy*</b>      | No                  | 327,083     | 97.9% | 97.9% |
|                                                     | Yes                 | 6,882       | 2.1%  | 2.1%  |
| <b>Hormonal contraception<br/>use*</b>              | No                  | 325,845     | 97.6% | 98.7% |
|                                                     | Yes                 | 8,120       | 2.4%  | 1.3%  |
| <b>Hormone replacement<br/>treatment (HRT) use*</b> | No                  | 331,875     | 99.4% | 99.4% |
|                                                     | Yes                 | 2,090       | 0.6%  | 0.6%  |
| <b>Current smoker</b>                               | No                  | 440,007     | 68.5% | 90.1% |
|                                                     | Yes                 | 48,385      | 7.5%  | 9.9%  |
|                                                     | Unknown             | 153,665     | 23.9% |       |
| <b>Alcohol intake</b>                               | Never/rarely        | 420,152     | 65.4% | 87.4% |
|                                                     | 1-3 times per month | 47,492      | 7.4%  | 9.9%  |
|                                                     | 1-6 times per week  | 13,264      | 2.1%  | 2.8%  |
|                                                     | Daily               | 5,473       | 0.9%  | 1.1%  |
|                                                     | Unknown             | 155,676     | 24.2% |       |
| <b>Weight (kg)</b>                                  | Mean (SD)           | 67.1 (13.3) |       |       |
|                                                     | <50 kg              | 28,271      | 4.4%  | 5.5%  |
|                                                     | 50-59 kg            | 118,626     | 18.5% | 23.0% |
|                                                     | 60-69 kg            | 171,510     | 26.7% | 33.2% |
|                                                     | 70-79 kg            | 117,140     | 18.2% | 22.7% |
|                                                     | 80-89 kg            | 51,696      | 8.1%  | 10.0% |
|                                                     | 90-99 kg            | 17,849      | 2.8%  | 3.5%  |
|                                                     | 100 kg or more      | 11,114      | 1.7%  | 2.2%  |
|                                                     | Unknown             | 125,851     | 19.6% |       |
| <b>Years of formal education</b>                    | 0 year              | 19,625      | 3.1%  | 4.6%  |

|                                                      |                                      |                |       |       |
|------------------------------------------------------|--------------------------------------|----------------|-------|-------|
|                                                      | 1-6 years                            | 97,188         | 15.1% | 22.9% |
|                                                      | 7-12 years                           | 167,787        | 26.1% | 39.5% |
|                                                      | Over 12 years                        | 140,356        | 21.9% | 33.0% |
|                                                      | Unknown                              | 217,101        | 33.8% |       |
| <b>Meeting WHO physical activity recommendations</b> | No                                   | 335,871        | 52.3% | 72.3% |
|                                                      | Yes                                  | 128,505        | 20.0% | 27.7% |
|                                                      | Unknown                              | 177,681        | 27.7% |       |
| <b>Payment for consultations/medications</b>         | Pay nothing                          | 83,273         | 13.0% | 19.6% |
|                                                      | Pay part                             | 38,340         | 6.0%  | 9.0%  |
|                                                      | Pay fully                            | 44,646         | 7.0%  | 10.5% |
|                                                      | Unknown                              | 475,798        | 74.1% |       |
| <b>Previous positive test for COVID-19</b>           | No                                   | 450,903        | 70.2% | 94.8% |
|                                                      | Yes                                  | 24,614         | 3.8%  | 5.2%  |
|                                                      | Unknown                              | 166,540        | 25.9% |       |
| <b>How BP treatment affected by COVID-19</b>         | Not at all or N/A                    | 381,996        | 59.5% | 97.9% |
|                                                      | Usual drug(s) unavailable            | 2,934          | 0.5%  | 0.8%  |
|                                                      | Old drug(s) changed                  | 807            | 0.1%  | 0.2%  |
|                                                      | New drug(s) added                    | 2,066          | 0.3%  | 0.5%  |
|                                                      | Began drug(s) for the first time     | 438            | 0.1%  | 0.1%  |
|                                                      | Stopped my drugs                     | 482            | 0.1%  | 0.1%  |
|                                                      | Unable to access healthcare provider | 1,653          | 0.3%  | 0.4%  |
|                                                      | Unknown                              | 251,681        | 39.2% |       |
| <b>Previous COVID-19 vaccination</b>                 | No                                   | 255,919        | 39.9% | 54.8% |
|                                                      | Yes                                  | 210,839        | 32.8% | 45.2% |
|                                                      | Unknown                              | 175,299        | 27.3% |       |
| <b>Manufacturer of the BP device used</b>            | Omron                                | 447,749        | 69.7% | 90.1% |
|                                                      | Other                                | 49,252         | 7.7%  | 9.9%  |
|                                                      | Unknown                              | 145,056        | 22.6% |       |
| <b>Of Omron devices, model of device</b>             | Omron HEM-7081-IT                    | 217,475        | 33.9% | 33.9% |
|                                                      | Omron JPN1                           | 15,045         | 2.3%  | 2.3%  |
|                                                      | Omron M2 Basic                       | 6,847          | 1.1%  | 1.1%  |
|                                                      | Omron M3 Intellisense                | 962            | 0.1%  | 0.1%  |
|                                                      | Omron device NOS                     | 207,420        | 32.3% | 32.3% |
| <b>Day of week of screening</b>                      | Monday                               | 94,605         | 14.7% | 15.6% |
|                                                      | Tuesday                              | 89,547         | 13.9% | 14.7% |
|                                                      | Wednesday                            | 106,572        | 16.6% | 17.5% |
|                                                      | Thursday                             | 100,041        | 15.6% | 16.4% |
|                                                      | Friday                               | 99,399         | 15.5% | 16.3% |
|                                                      | Saturday                             | 68,122         | 10.6% | 11.2% |
|                                                      | Sunday                               | 49,987         | 7.8%  | 8.2%  |
|                                                      | Unknown                              | 33,784         | 5.3%  |       |
| <b>Total participants</b>                            |                                      | <b>642,057</b> |       |       |

\* Percentage given of females only

**Table S4: Mean BP and corresponding number and proportion of participants with hypertension based on the mean of each reading (of 1,133,008 participants with all 3 readings)**

| BP reading               | Mean systolic BP (mmHg) | Mean diastolic BP (mmHg) | Number with hypertension | Percentage with hypertension |
|--------------------------|-------------------------|--------------------------|--------------------------|------------------------------|
| 1                        | 126.3                   | 80.4                     | 211,257                  | 32.9%                        |
| 2                        | 124.4                   | 79.2                     | 195,328                  | 30.4%                        |
| 3                        | 123.5                   | 78.6                     | 187,138                  | 29.1%                        |
| Mean of 1 & 2            | 125.6                   | 80.0                     | 197,540                  | 30.8%                        |
| <b>Mean of 2 &amp; 3</b> | <b>124.2</b>            | <b>79.1</b>              | <b>186,820</b>           | <b>29.1%</b>                 |
| Mean of 1 & 2 & 3        | 124.7                   | 79.4                     | 187,668                  | 29.2%                        |

**Table S5: Mean systolic and diastolic BP and percentages with raised BP comparing the complete case to the partial, full and combined imputation models**

| Model          | Total in analysis | Mean systolic BP (mmHg) | Mean diastolic BP (mmHg) | Percentage with raised BP |                   |               |
|----------------|-------------------|-------------------------|--------------------------|---------------------------|-------------------|---------------|
|                |                   |                         |                          | Overall                   | Not on medication | On medication |
| Complete case  | 552,080*          | 124.19                  | 79.08                    | 25.39%                    | 20.64%            | 46.26%        |
| Partial model  | 642,057           | 124.54                  | 79.14                    | 25.71%                    | 20.55%            | 46.33%        |
| Full model     | 574,668*          | 124.27                  | 79.15                    | 25.62%                    | 20.43%            | 46.34%        |
| Combined model | 642,057           | 124.50                  | 79.12                    | 25.64%                    | 20.51%            | 46.09%        |

\*Combined MI model is the primary imputation model used in analysis

**Table S6: Worldwide and regional confidence intervals for estimates of percentage with hypertension, awareness, on treatment and controlled (of all 642,057 participants)**

| Region                          | Percentage with hypertension | Percentage of hypertensives aware | Percentage of hypertensives on medication | Percentage of those on medication with controlled BP | Percentage of all hypertensives controlled |
|---------------------------------|------------------------------|-----------------------------------|-------------------------------------------|------------------------------------------------------|--------------------------------------------|
| East Asia                       | (26.4% , 26.7%)              | (32.1% , 32.7%)                   | (30.4% , 30.8%)                           | (60.8% , 62.2%)                                      | (18.5% , 19.1%)                            |
| Americas                        | (38.4% , 38.9%)              | (72.1% , 73.7%)                   | (59.1% , 59.8%)                           | (54.4% , 55.5%)                                      | (32.3% , 33.1%)                            |
| South-east Asia and Australasia | (40.8% , 41.5%)              | (49.0% , 50.2%)                   | (44.7% , 45.4%)                           | (46.0% , 47.5%)                                      | (20.7% , 21.5%)                            |
| Sub-Saharan Africa              | (37.5% , 38.2%)              | (65.8% , 67.6%)                   | (63.0% , 64.2%)                           | (51.2% , 52.7%)                                      | (32.4% , 33.6%)                            |
| South Asia                      | (35.2% , 36.0%)              | (63.2% , 66.0%)                   | (55.0% , 56.2%)                           | (56.7% , 58.6%)                                      | (31.4% , 32.7%)                            |
| Europe                          | (50.4% , 51.4%)              | (70.1% , 72.3%)                   | (65.4% , 66.7%)                           | (48.2% , 50.0%)                                      | (31.8% , 33.1%)                            |
| Northern Africa and Middle East | (47.1% , 52.9%)              | (64.5% , 76.0%)                   | (61.8% , 69.4%)                           | (34.7% , 44.7%)                                      | (22.4% , 29.6%)                            |
| <b>Worldwide</b>                | <b>(35.1% , 35.3%)</b>       | <b>(56.6% , 57.1%)</b>            | <b>(50.1% , 50.5%)</b>                    | <b>(53.6% , 54.2%)</b>                               | <b>(26.9% , 27.3%)</b>                     |

**Table S7: Number and percentage of participants hypertension according to age group**

| Age category (years) | Number with hypertension | Percentage with hypertension | Denominator |
|----------------------|--------------------------|------------------------------|-------------|
| 18-29                | 16,777                   | 13.8%                        | 121,671     |
| 30-39                | 26,921                   | 23.3%                        | 115,660     |
| 40-49                | 40,452                   | 33.4%                        | 121,071     |
| 50-59                | 55,169                   | 42.6%                        | 129,556     |
| 60-69                | 48,588                   | 53.1%                        | 91,534      |
| 70 or more           | 36,322                   | 61.9%                        | 58,648      |
| Missing              | 1,653                    | 42.2%                        | 3,917       |

**Table S8: Number and percentage of participants with hypertension according to sex and age group**

| Age category (years) | Female                   |                              |                         |       |             | Male                     |                              |                         |       |             |
|----------------------|--------------------------|------------------------------|-------------------------|-------|-------------|--------------------------|------------------------------|-------------------------|-------|-------------|
|                      | Number with hypertension | Percentage with hypertension | 95% confidence interval |       | Denominator | Number with hypertension | Percentage with hypertension | 95% confidence interval |       | Denominator |
|                      |                          |                              | Lower                   | Upper |             |                          |                              | Lower                   | Upper |             |
| 18-29                | 7,618                    | 12.2%                        | 12.0%                   | 12.5% | 62,284      | 9,082                    | 15.4%                        | 15.1%                   | 15.7% | 58,963      |
| 30-39                | 13,100                   | 21.7%                        | 21.3%                   | 22.0% | 60,427      | 13,723                   | 25.0%                        | 24.6%                   | 25.4% | 54,929      |
| 40-49                | 19,490                   | 30.5%                        | 30.2%                   | 30.9% | 63,854      | 20,834                   | 36.7%                        | 36.3%                   | 37.1% | 56,840      |
| 50-59                | 28,371                   | 41.9%                        | 41.5%                   | 42.2% | 67,785      | 26,642                   | 43.4%                        | 43.0%                   | 43.8% | 61,407      |
| 60-69                | 25,084                   | 52.8%                        | 52.4%                   | 53.3% | 47,506      | 23,432                   | 53.5%                        | 53.0%                   | 53.9% | 43,830      |
| 70 or more           | 19,328                   | 63.8%                        | 63.2%                   | 64.3% | 30,303      | 16,942                   | 60.0%                        | 59.4%                   | 60.6% | 28,249      |
| Missing              | 811                      | 44.9%                        | 42.5%                   | 47.2% | 1,806       | 672                      | 38.2%                        | 35.9%                   | 40.5% | 1,762       |



**Table S9: Numbers with hypertension and parameters of awareness, treatment and control stratified by sex**

| Sex    | Number with hypertension | Percentage with hypertension | Percentage of hypertensives aware | Percentage of hypertensives on medication | Percentage of those on medication with controlled BP | Percentage of all hypertensives controlled |
|--------|--------------------------|------------------------------|-----------------------------------|-------------------------------------------|------------------------------------------------------|--------------------------------------------|
| Female | 113,802                  | 34.1%                        | 62.8%                             | 55.8%                                     | 56.2%                                                | 31.4%                                      |
| Male   | 111,327                  | 36.4%                        | 50.7%                             | 44.8%                                     | 51.0%                                                | 22.9%                                      |

**Table S10: Worldwide and regional numbers with hypertension and parameters of awareness, treatment and control after age and sex standardisation (of 636,658 participants with age and sex recorded)**

| Region                          | Number with hypertension | Percentage with hypertension | Percentage of hypertensives aware | Percentage of hypertensives on medication | Percentage of those on medication with controlled BP | Percentage of all hypertensives controlled |
|---------------------------------|--------------------------|------------------------------|-----------------------------------|-------------------------------------------|------------------------------------------------------|--------------------------------------------|
| East Asia                       | 52,195                   | 23.5%                        | 32.4%                             | 24.2%                                     | 53.9%                                                | 13.1%                                      |
| Americas                        | 46,727                   | 30.1%                        | 77.5%                             | 37.1%                                     | 59.5%                                                | 22.0%                                      |
| South-east Asia and Australasia | 34,336                   | 39.0%                        | 50.6%                             | 36.1%                                     | 57.7%                                                | 20.8%                                      |
| Sub-Saharan Africa              | 26,834                   | 36.5%                        | 62.9%                             | 51.5%                                     | 55.5%                                                | 28.6%                                      |
| South Asia                      | 19,026                   | 32.8%                        | 60.9%                             | 45.6%                                     | 62.8%                                                | 28.6%                                      |
| Europe                          | 15,670                   | 41.1%                        | 70.6%                             | 42.0%                                     | 61.1%                                                | 25.6%                                      |
| Northern Africa and Middle East | 520                      | 45.4%                        | 69.1%                             | 58.7%                                     | 35.6%                                                | 20.9%                                      |
| <b>Worldwide</b>                | <b>197,852</b>           | <b>31.1%</b>                 | <b>56.2%</b>                      | <b>38.0%</b>                              | <b>59.9%</b>                                         | <b>22.8%</b>                               |

## Measures of association

**Table S11: Results from linear mixed models comparing mean systolic and diastolic BP in those with each risk factor compared to those without, adjusted for age, sex, of participants with hypertension**

| Blood pressure | Risk factor                                    | Mean BP difference compared to absence of risk factor (mmHg) | Monte Carlo error of estimate | Standard error | t value  | p value | 95% confidence interval |             | Number in analysis† |
|----------------|------------------------------------------------|--------------------------------------------------------------|-------------------------------|----------------|----------|---------|-------------------------|-------------|---------------------|
|                |                                                |                                                              |                               |                |          |         | Lower bound             | Upper bound |                     |
| Systolic       | Known hypertension§                            | -8.923                                                       | 0.004                         | 0.093          | -95.660  | <0.001  | -9.105                  | -8.740      | 217,750             |
| Systolic       | At least one antihypertensive medication*      | -12.517                                                      | 0.006                         | 0.120          | -104.590 | <0.001  | -12.751                 | -12.282     | 169,406             |
| Systolic       | Number of antihypertensive classes: 1*         | -13.323                                                      | 0.005                         | 0.132          | -101.030 | <0.001  | -13.582                 | -13.065     | 158,500             |
| Systolic       | Number of antihypertensive classes: 2*         | -13.026                                                      | 0.004                         | 0.153          | -85.130  | <0.001  | -13.326                 | -12.726     | 158,500             |
| Systolic       | Number of antihypertensive classes: 3*         | -6.920                                                       | 0.006                         | 0.215          | -32.230  | <0.001  | -7.341                  | -6.500      | 158,500             |
| Systolic       | Number of antihypertensive classes: 4*         | -6.100                                                       | 0.011                         | 0.333          | -18.330  | <0.001  | -6.752                  | -5.447      | 158,500             |
| Systolic       | Number of antihypertensive classes: 5 or more* | -10.410                                                      | 0.026                         | 0.645          | -16.140  | <0.001  | -11.674                 | -9.146      | 158,500             |
| Diastolic      | Known hypertension§                            | -6.389                                                       | 0.003                         | 0.059          | -107.970 | <0.001  | -6.505                  | -6.273      | 217,750             |
| Diastolic      | At least one antihypertensive medication*      | -9.627                                                       | 0.003                         | 0.074          | -129.390 | <0.001  | -9.773                  | -9.481      | 169,406             |
| Diastolic      | Number of antihypertensive classes: 1*         | -10.159                                                      | 0.001                         | 0.082          | -123.250 | <0.001  | -10.321                 | -9.998      | 158,500             |
| Diastolic      | Number of antihypertensive classes: 2*         | -9.729                                                       | 0.004                         | 0.097          | -100.260 | <0.001  | -9.919                  | -9.539      | 158,500             |
| Diastolic      | Number of antihypertensive classes: 3*         | -7.234                                                       | 0.005                         | 0.136          | -53.300  | <0.001  | -7.500                  | -6.968      | 158,500             |
| Diastolic      | Number of antihypertensive classes: 4*         | -7.179                                                       | 0.009                         | 0.211          | -34.090  | <0.001  | -7.592                  | -6.766      | 158,500             |
| Diastolic      | Number of antihypertensive classes: 5 or more* | -9.697                                                       | 0.014                         | 0.405          | -23.940  | <0.001  | -10.491                 | -8.903      | 158,500             |

§ Adjusted in addition for antihypertensive medication use

\* Compared to those on no antihypertensive medication

† Numbers in analysis vary as dependent on the number of individuals with complete data on each risk factor

**Table S12: Results from linear mixed models comparing mean systolic and diastolic BP for participants with a previous positive COVID-19 test or vaccination, adjusted for age, sex and antihypertensive medication**

| Blood pressure | Risk factor                                | Mean BP difference compared to absence of factor (mmHg) | Monte Carlo error of estimate | Standard error | t value | p value | 95% confidence interval |             | Number in analysis† |
|----------------|--------------------------------------------|---------------------------------------------------------|-------------------------------|----------------|---------|---------|-------------------------|-------------|---------------------|
|                |                                            |                                                         |                               |                |         |         | Lower bound             | Upper bound |                     |
| Systolic       | Positive test for COVID-19                 | -0.273                                                  | 0.006                         | 0.161          | -1.690  | 0.091   | -0.589                  | 0.043       | 357,976             |
| Systolic       | Received at least one COVID-19 vaccination | -0.684                                                  | 0.001                         | 0.066          | -10.360 | <0.001  | -0.813                  | -0.554      | 355,307             |
| Diastolic      | Positive test for COVID-19                 | 0.318                                                   | 0.005                         | 0.106          | 3.000   | 0.003   | 0.110                   | 0.527       | 357,976             |
| Diastolic      | Received at least one COVID-19 vaccination | -0.935                                                  | 0.001                         | 0.043          | -21.530 | <0.001  | -1.020                  | -0.850      | 355,307             |

† Numbers in analysis vary as dependent on the number of individuals with complete data on each risk factor

**Table S13: Results from linear mixed models comparing mean systolic and diastolic BP in those with each risk factor compared to those without, adjusted for age, sex and antihypertensive medication.**

| Blood pressure | Risk factor                                                                  | Mean BP difference compared to absence of risk factor (mmHg) | Monte Carlo error of estimate | Standard error | t value | p value | 95% confidence interval |             | Number in analysis† |
|----------------|------------------------------------------------------------------------------|--------------------------------------------------------------|-------------------------------|----------------|---------|---------|-------------------------|-------------|---------------------|
|                |                                                                              |                                                              |                               |                |         |         | Lower bound             | Upper bound |                     |
| Systolic       | Current smoker (vs non-smoker)                                               | 0.272                                                        | 0.003                         | 0.104          | 2.630   | 0.009   | 0.069                   | 0.475       | 368,245             |
| Systolic       | Alcohol: 1-3 times per month§                                                | -0.380                                                       | 0.004                         | 0.105          | -3.630  | <0.001  | -0.585                  | -0.174      | 368,208             |
| Systolic       | Alcohol: 1-6 times per week§                                                 | 1.372                                                        | 0.008                         | 0.199          | 6.880   | <0.001  | 0.981                   | 1.763       | 368,208             |
| Systolic       | Alcohol: daily§                                                              | 2.002                                                        | 0.010                         | 0.301          | 6.650   | <0.001  | 1.412                   | 2.592       | 368,208             |
| Systolic       | Education: 1-6 years*                                                        | 1.472                                                        | 0.004                         | 0.153          | 9.650   | <0.001  | 1.173                   | 1.772       | 337,023             |
| Systolic       | Education: 7-12 years*                                                       | -0.168                                                       | 0.003                         | 0.151          | -1.120  | 0.264   | -0.463                  | 0.127       | 337,023             |
| Systolic       | Education: over 12 years*                                                    | -2.355                                                       | 0.003                         | 0.158          | -14.930 | <0.001  | -2.664                  | -2.045      | 337,023             |
| Systolic       | Physical activity: 150 mins of moderate or 75 mins of more vigorous per week | -1.418                                                       | 0.002                         | 0.078          | -18.250 | <0.001  | -1.570                  | -1.265      | 353,826             |
| Diastolic      | Current smoker (vs non-smoker)                                               | 0.641                                                        | 0.002                         | 0.068          | 9.410   | <0.001  | 0.507                   | 0.774       | 368,245             |
| Diastolic      | Alcohol: 1-3 times per month§                                                | 0.572                                                        | 0.003                         | 0.069          | 8.240   | <0.001  | 0.436                   | 0.708       | 368,208             |
| Diastolic      | Alcohol: 1-6 times per week§                                                 | 3.078                                                        | 0.004                         | 0.130          | 23.680  | <0.001  | 2.824                   | 3.333       | 368,208             |
| Diastolic      | Alcohol: daily§                                                              | 2.581                                                        | 0.005                         | 0.197          | 13.130  | <0.001  | 2.196                   | 2.967       | 368,208             |
| Diastolic      | Education: 1-6 years*                                                        | -0.571                                                       | 0.003                         | 0.101          | -5.680  | <0.001  | -0.768                  | -0.374      | 337,023             |
| Diastolic      | Education: 7-12 years*                                                       | -0.744                                                       | 0.003                         | 0.099          | -7.500  | <0.001  | -0.939                  | -0.550      | 337,023             |
| Diastolic      | Education: over 12 years*                                                    | -1.886                                                       | 0.002                         | 0.104          | -18.160 | <0.001  | -2.089                  | -1.682      | 337,023             |
| Diastolic      | Physical activity: 150 mins of moderate or 75 mins of more vigorous per week | -1.138                                                       | 0.001                         | 0.051          | -22.370 | <0.001  | -1.238                  | -1.038      | 353,826             |

§ Compared with 'never/rare' alcohol use

\* Compared with '0 years' of education

† Numbers in analysis vary as dependent on the number of individuals with complete data on each risk factor

**Table S14: Results from linear mixed models comparing mean systolic and diastolic BP in those with diabetes, previous myocardial infarction or stroke compared to those without, adjusted for age, sex and antihypertensive medication.**

| Blood pressure | Co-morbidity                   | Mean BP difference compared to absence of condition (mmHg) | Monte Carlo error of estimate | Standard error | t value | p value | 95% confidence interval |             | Number in analysis† |
|----------------|--------------------------------|------------------------------------------------------------|-------------------------------|----------------|---------|---------|-------------------------|-------------|---------------------|
|                |                                |                                                            |                               |                |         |         | Lower bound             | Upper bound |                     |
| Systolic       | Diabetes                       | -0.309                                                     | 0.011                         | 0.148          | -2.100  | 0.036   | -0.599                  | -0.020      | 367,810             |
| Systolic       | Previous Myocardial Infarction | -0.217                                                     | 0.011                         | 0.201          | -1.080  | 0.280   | -0.610                  | 0.177       | 368,001             |
| Systolic       | Previous Stroke                | 0.175                                                      | 0.019                         | 0.261          | 0.670   | 0.503   | -0.337                  | 0.686       | 368,129             |
| Diastolic      | Diabetes                       | -0.897                                                     | 0.004                         | 0.095          | -9.490  | <0.001  | -1.083                  | -0.712      | 367,810             |
| Diastolic      | Previous Myocardial Infarction | -1.425                                                     | 0.009                         | 0.134          | -10.670 | <0.001  | -1.687                  | -1.163      | 368,001             |
| Diastolic      | Previous Stroke                | 0.058                                                      | 0.011                         | 0.169          | 0.350   | 0.730   | -0.273                  | 0.390       | 368,129             |

† Numbers in analysis vary as dependent on the number of individuals with complete data on each risk factor

**Table S15: Results from linear mixed models comparing mean systolic and diastolic BP in females with pregnancy, previous hypertension in pregnancy, hormone replacement therapy or hormonal contraception use, adjusted for age and antihypertensive medication**

| Blood pressure | Risk factor                        | Mean BP difference compared to absence of risk factor (mmHg) | Monte Carlo error of estimate | Standard error | t value | p value | 95% confidence interval |             | Number in analysis† |
|----------------|------------------------------------|--------------------------------------------------------------|-------------------------------|----------------|---------|---------|-------------------------|-------------|---------------------|
|                |                                    |                                                              |                               |                |         |         | Lower bound             | Upper bound |                     |
| Systolic       | Current pregnancy                  | -4.654                                                       | 0.007                         | 0.339          | -13.720 | <0.001  | -5.319                  | -3.990      | 213,121             |
| Systolic       | Hypertension in previous pregnancy | 2.535                                                        | 0.008                         | 0.275          | 9.230   | <0.001  | 1.997                   | 3.073       | 213,121             |
| Systolic       | Hormone Replacement Therapy use    | -1.163                                                       | 0.011                         | 0.517          | -2.250  | 0.025   | -2.176                  | -0.149      | 213,121             |
| Systolic       | Hormonal contraception use         | 0.323                                                        | 0.016                         | 0.307          | 1.050   | 0.294   | -0.280                  | 0.925       | 213,121             |
| Diastolic      | Current pregnancy                  | -4.202                                                       | 0.006                         | 0.217          | -19.330 | <0.001  | -4.628                  | -3.776      | 213,121             |
| Diastolic      | Hypertension in previous pregnancy | 2.570                                                        | 0.006                         | 0.176          | 14.620  | <0.001  | 2.225                   | 2.914       | 213,121             |
| Diastolic      | Hormone Replacement Therapy use    | -0.100                                                       | 0.012                         | 0.333          | -0.300  | 0.765   | -0.752                  | 0.553       | 213,121             |
| Diastolic      | Hormonal contraception use         | 0.816                                                        | 0.011                         | 0.197          | 4.140   | <0.001  | 0.430                   | 1.203       | 213,121             |

† Numbers in analysis vary as dependent on the number of individuals with complete data on each risk factor.

**S16: Results from linear mixed models comparing mean systolic and diastolic BP in each heart rate category compared to heart rate in the range 40-59 bpm, adjusted for age, sex and antihypertensive medication (n=451,892)**

| Blood pressure | Heart rate (bpm)  | Mean BP difference compared to reference heart rate (mmHg) | Monte Carlo error of estimate | Standard error | t value | p value | 95% confidence interval |             |
|----------------|-------------------|------------------------------------------------------------|-------------------------------|----------------|---------|---------|-------------------------|-------------|
|                |                   |                                                            |                               |                |         |         | Lower bound             | Upper bound |
| Systolic       | 40-59 (reference) | -                                                          | -                             | -              | -       | -       | -                       | -           |
| Systolic       | 60-69             | 60-69                                                      | -1.623                        | 0.001          | 0.156   | -10.39  | <0.001                  | -1.930      |
| Systolic       | 70-79             | 70-79                                                      | -1.350                        | 0.001          | 0.151   | -8.96   | <0.001                  | -1.645      |
| Systolic       | 80-89             | 80-89                                                      | -0.335                        | 0.001          | 0.152   | -2.2    | 0.028                   | -0.633      |
| Systolic       | 90-99             | 90-99                                                      | 1.518                         | 0.001          | 0.163   | 9.33    | <0.001                  | 1.199       |
| Systolic       | 100 or more       | 100 or more                                                | 4.555                         | 0.002          | 0.191   | 23.85   | <0.001                  | 4.181       |
| Diastolic      | 40-59 (reference) | -                                                          | -                             | -              | -       | -       | -                       | -           |
| Diastolic      | 60-69             | 60-69                                                      | 1.579                         | 0.001          | 0.102   | 15.530  | <0.001                  | 1.380       |
| Diastolic      | 70-79             | 70-79                                                      | 3.069                         | 0.000          | 0.098   | 31.33   | <0.001                  | 2.877       |
| Diastolic      | 80-89             | 80-89                                                      | 4.781                         | 0.000          | 0.099   | 48.26   | <0.001                  | 4.586       |
| Diastolic      | 90-99             | 90-99                                                      | 6.300                         | 0.000          | 0.106   | 59.54   | <0.001                  | 6.093       |
| Diastolic      | 100 or more       | 100 or more                                                | 8.196                         | 0.001          | 0.124   | 65.99   | <0.001                  | 7.952       |

**Figure S1: Mean systolic and blood pressure by age and sex from linear mixed models, in participants not taking antihypertensive medication**

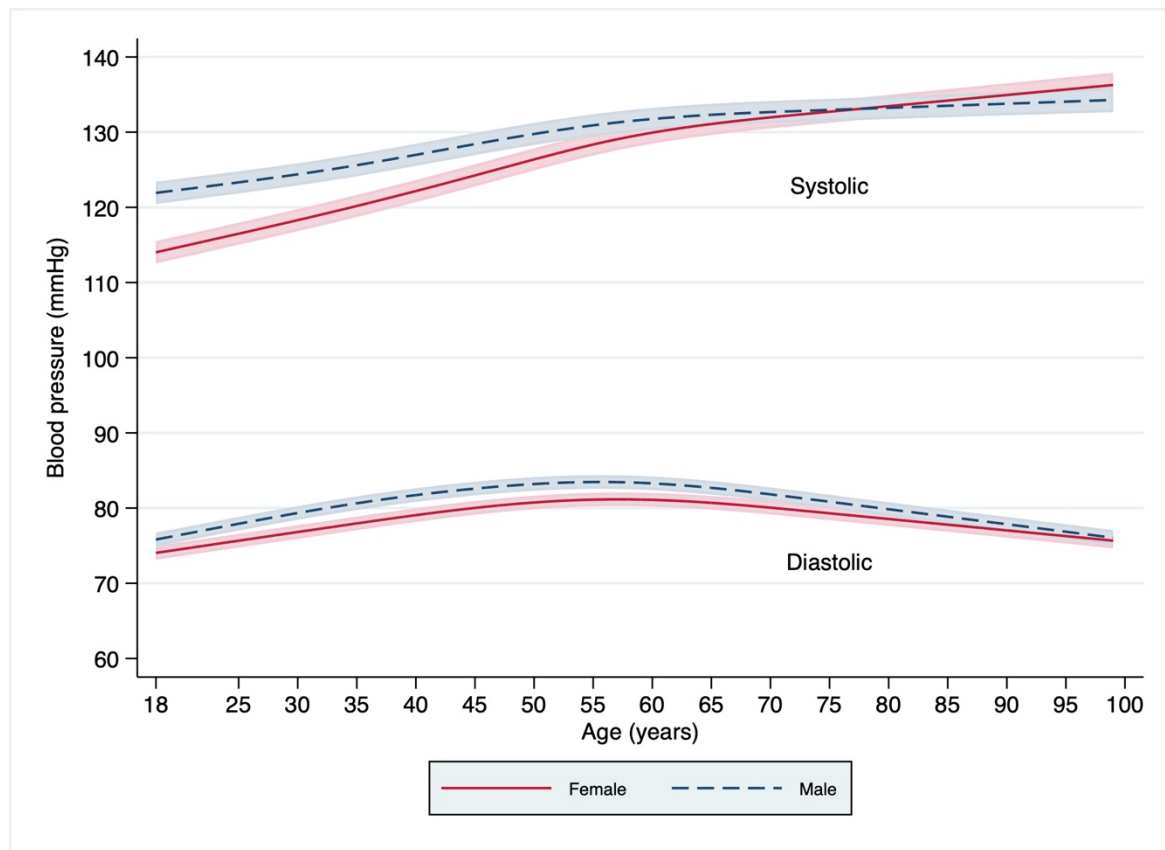

Note: shaded areas represent 95% confidence interval of estimate



**Figure S2: Difference in mean systolic and diastolic BP by heart rate category compared to heart rate <60 bpm, from linear mixed models adjusted for age and sex in participants not using antihypertensive medication**

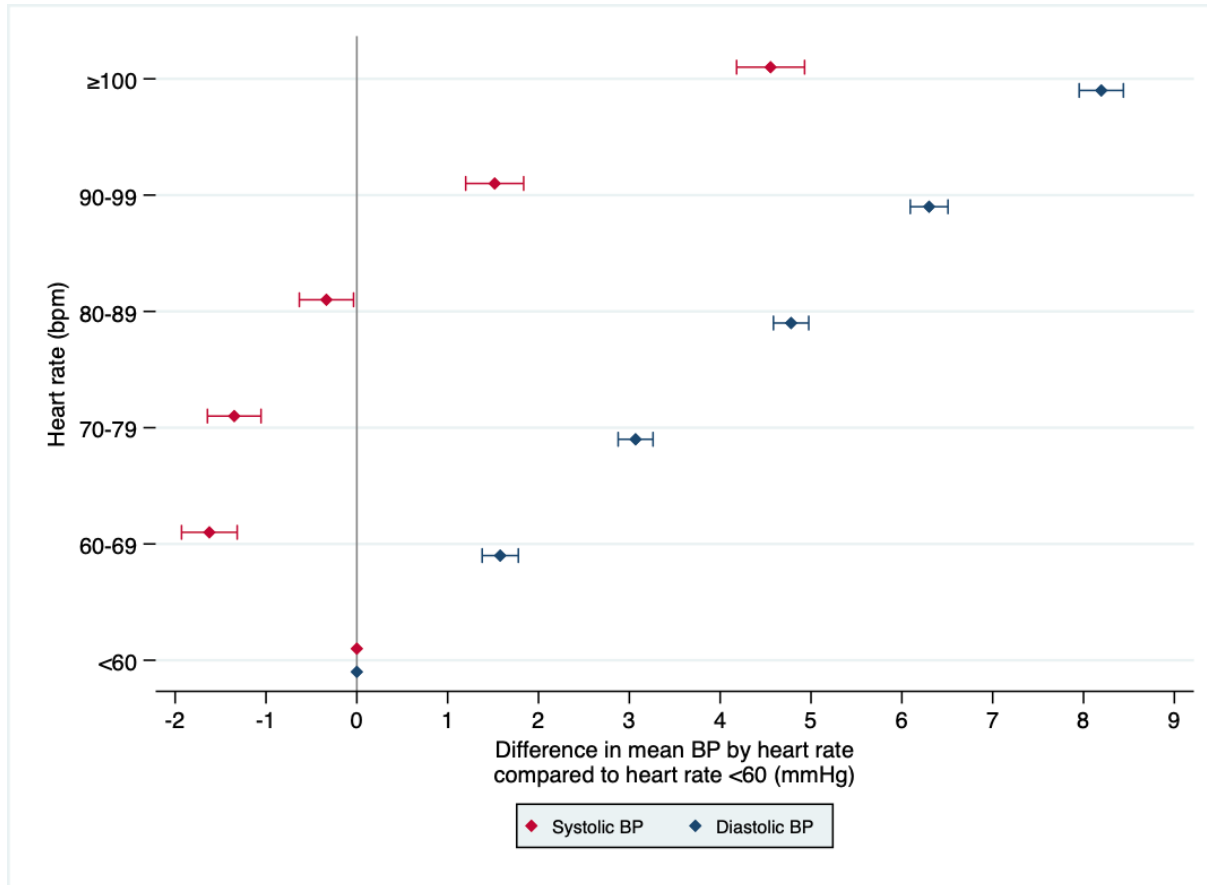

Note: diamonds represent coefficients and bars represent 95% confidence intervals of the estimate
